# Supplementary material for: Chitosan-modified, collagen-based biomimetic nanofibrous membranes as selective cell adhering wound dressings in the treatment of chemically burned corneas
Source: Royal Society of Chemistry journal article supplement (doi:10.1039/c3tb21845g), 2014-01-01
Supplement: c3tb21845g1.pdf [file c3tb21845g1.pdf]

### Supplementary Information

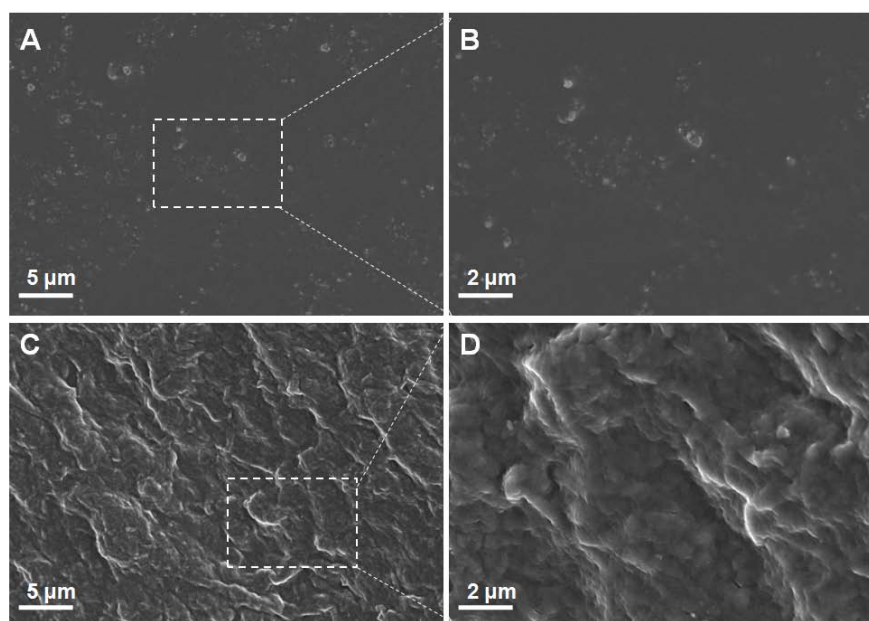

**Fig. S1.** SEM images of the film-cast COL-HA-PEO films (A, B) and their CS-modified membranes (C, D).

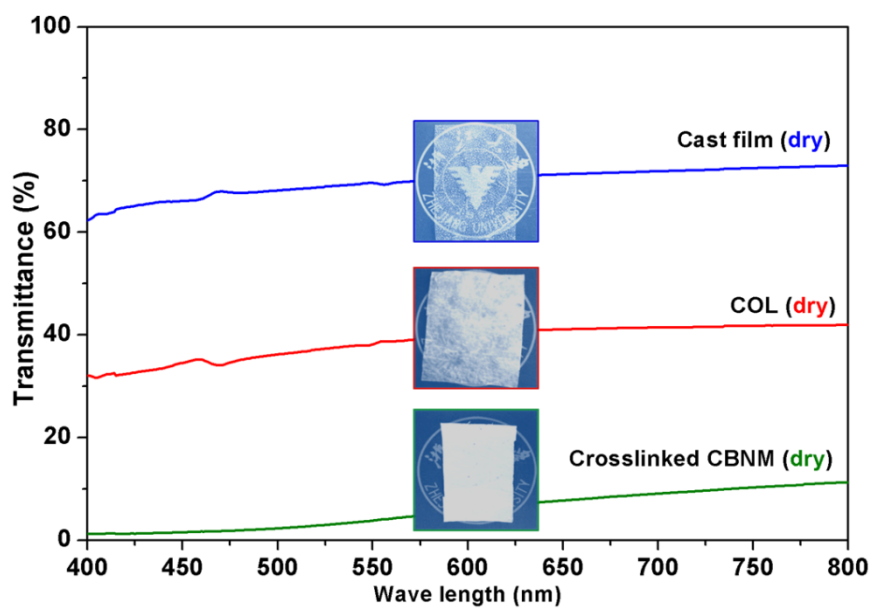

**Fig. S2.** Light transmittance of cast film, pure COL membrane and GA-crosslinked CBNM in dry state.
